# Supplementary material for: DCDT2980S, an Anti-CD22-Monomethyl Auristatin E Antibody–Drug Conjugate, Is a Potential Treatment for Non-Hodgkin Lymphoma
Source: Oxford University Press journal article supplement (doi:10.1158/1535-7163.mct-12-1173), 2013-04-18
Supplement: 15357163mct121173-sup-tab1.xls [file 15357163mct121173-sup-tab1.xls]

## Sheet: Sheet1
	Cell lines	surface expression MFI	DCDT2980S IC50 (ug/mL)	free MMAE IC50 (nM)	anti-gD-vc-MMAE (ug/mL)
	A3	0	50	0.5319	50
	A4	0	27.604	0.0651149	23.5943
	BJAB	483.36	8.36472	0.0725389	34.6911
	Ci-1	542.01	3.13403	0.143704	50
	DB	2874.66	0.628265	0.0306	0.383511
	DOHH2	204.39	0.142825	0.0127151	16.0858
	Farage	1269.99	0.0990001	0.00490168	31.9341
	Granta519	109.01	33.8001	0.313831	50
	HT	902.68	0.803741	0.27	20.2246
	Jeko	26.68	28.7533	0.214522	47.7567
	Karpas-1106p	1564.62	0.129843	0.00777917	34.8111
	Karpas-422	215.46	16.5843	0.252232	38.5615
	MC116	1205.55	0.0891457	0.024584	14.2498
	MHH-PREB-1	39.35	20.9297	0.0672643	50
	NU-DHL-1	24	6.65228	0.020892	22.4682
	NU-DUL-1	99.61	8.77547	0.00246284	9.90817
	OCI-Ly19	74.29	0.200801	0.0185734	18.1569
	Pfeiffer	44.07	6.4628	0.0139002	24.4207
	Ramos	n/a	0.0608256	0.011876	7.22778
	RC-K8	0.06	50	0.987399	50
	REC-1	93.07	50	15.5199	50
	Ri-1	215.41	6.09065	0.15	17.5247
	RL	178.89	22.7282	0.447945	50
	SC-1	140.98	44.8797	0.327581	50
	SCC-3	0.25	36.0624	0.433266	50
	SR-786	0	13.4454	0.0329262	8.66335
	SU-DHL-1	0.26	30.6448	0.386758	32.5596
	SU-DHL-10	3011	0.0632587	0.0371289	18.732
	SU-DHL-16	1039.28	0.810509	0.0494132	15.2365
	SU-DHL-4	835.19	7.081	0.295185	50
	SU-DHL-5	389.18	0.118449	0.00261001	8.69613
	SU-DHL-8	98.14	50	0.255774	50
	TK	23.06	50	0.452527	50
	Toledo	62.52	33.3333	0.881147	50
	U-698-M	436.04	17.0981	1.03897	50
	WSU-DLCL2	1313.16	0.0451517	0.0721228	26.3557
	WSU-FSCCL	67.79	40.737	0.179412	37.0249
	WSU-NHL	1126.55	50	n/a	50
				Table S1
